# Supplementary material for: Contingent strategies of risk management by snowshoe hares
Source: Atypon-hosted journal article supplement (doi:10.1139/facets-2018-0048), 2019-06-01
Supplement: facets-2018-0048_supplement1.pdf [file facets-2018-0048_supplement1.pdf]

## **Contingent strategies of risk management by snowshoe hares**

Douglas W. Morris\*

*Department of Biology, Lakehead University, Thunder Bay, ON, Canada (DWM)*

### **Supplementary Material**

Illustrations of the study site, layout of snowshoe-hare foraging stations and representative photographs associated with studies of risk management by snowshoe hares in northern Ontario, Canada during winter 2018.

## 2018 Experiment

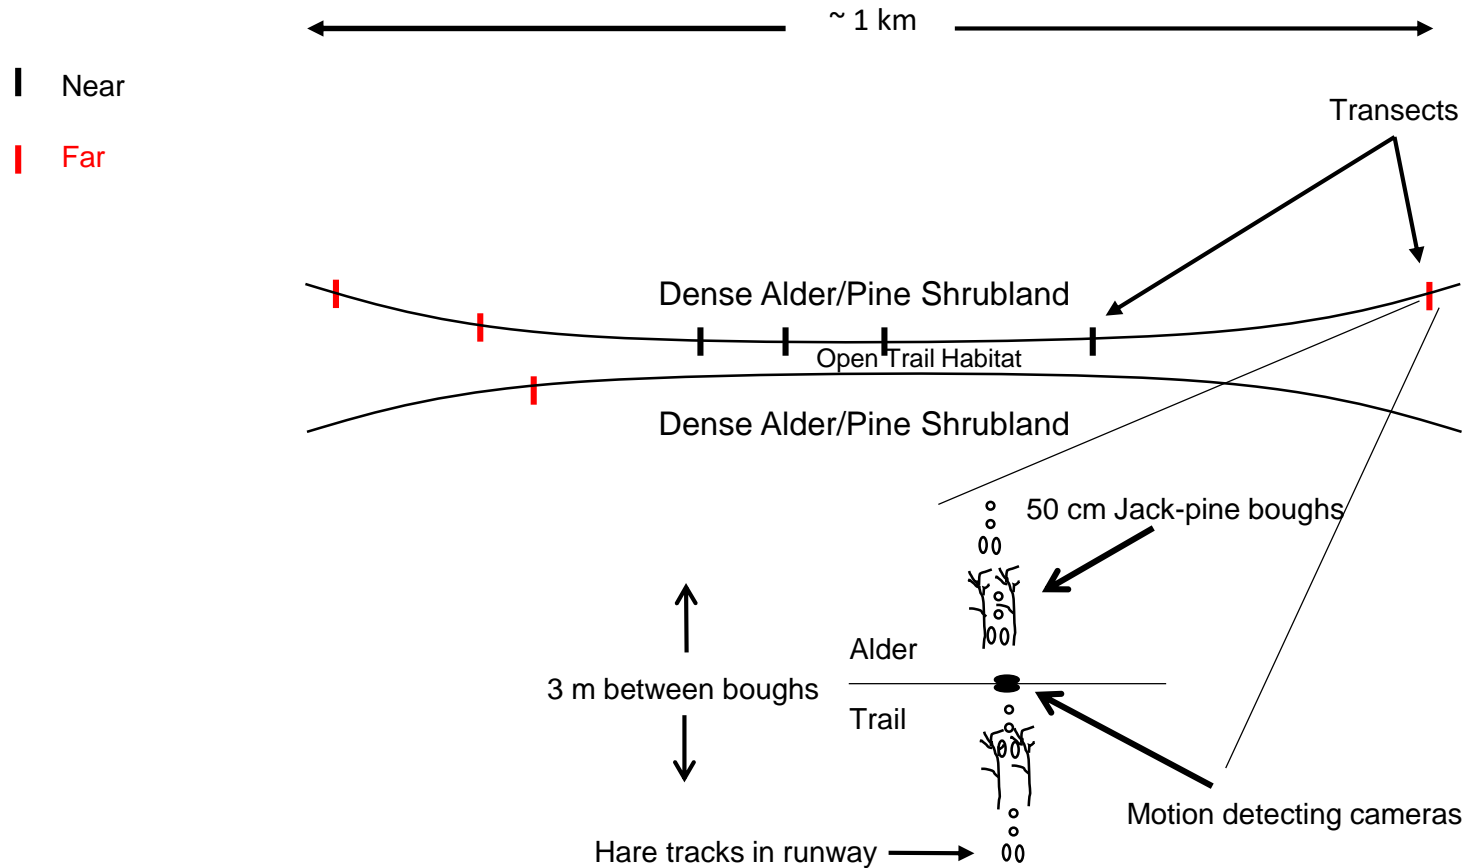

**Fig. S1** Schematic of the research site and 2018 experimental design used to assess risk management by snowshoe hares in northern Ontario, Canada (after Morris DW and Vijayan S. 2018. Trade-offs between sight lines and escape habitat determine spatial strategies of risk management by a keystone herbivore. *FACETS* 3:1-20).

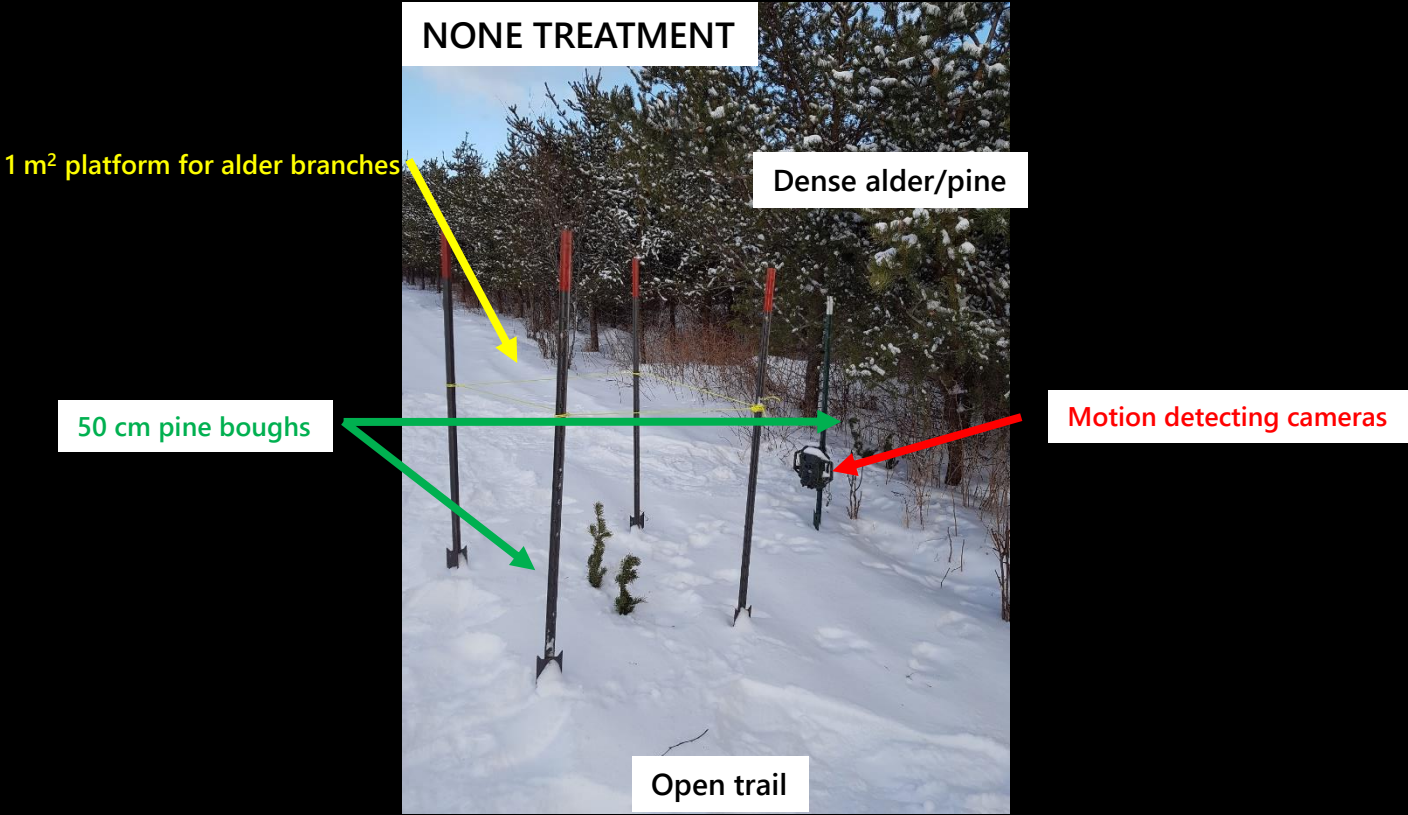

**Fig. S2** Location of pine boughs and cameras assessing snowshoe hare foraging and vigilance in open trail and dense alder/pine habitats (open treatment).

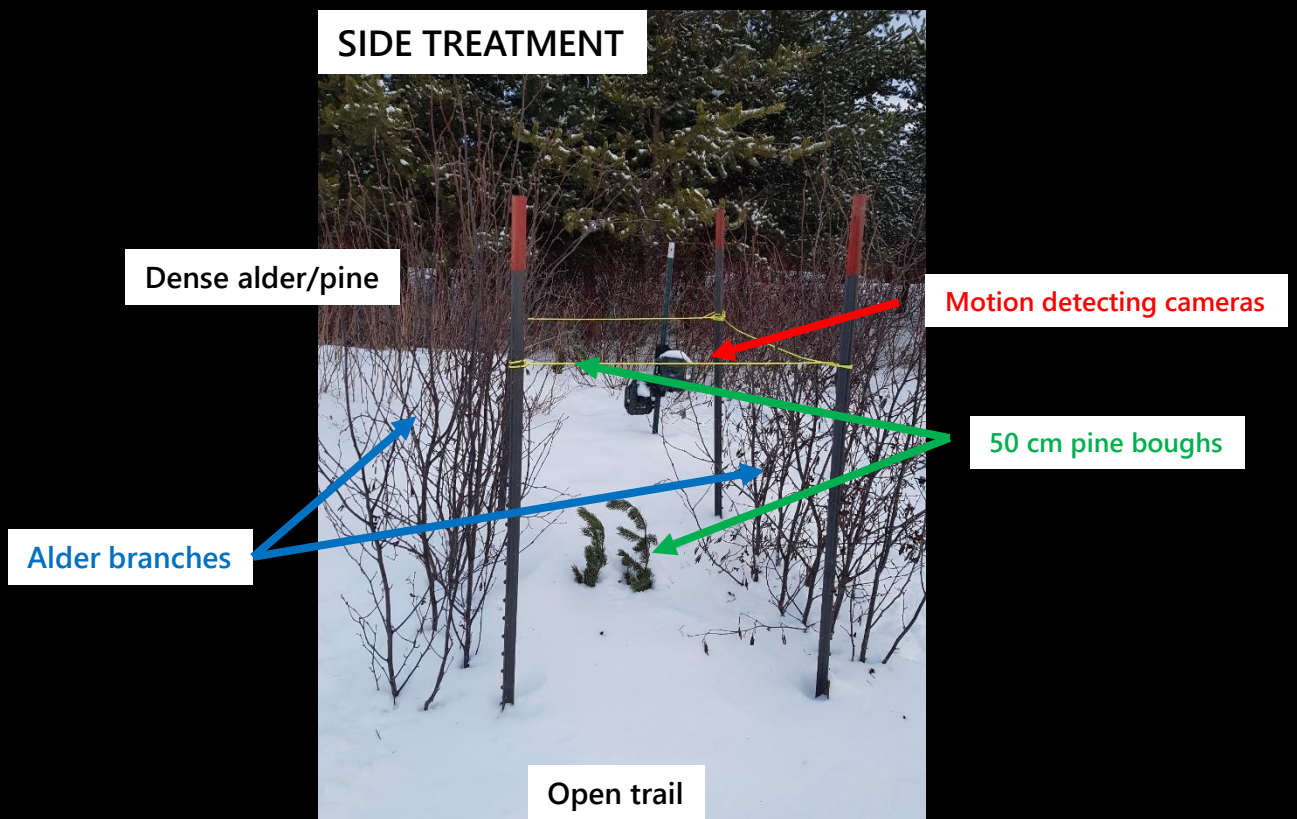

**Fig. S3** Location of pine boughs and cameras assessing snowshoe hare foraging and vigilance in open trail and dense alder/pine habitats (side treatment).
